# Supplementary material for: Non-typhoidal Salmonella among slaughterhouse workers and in the pork value chain in selected districts of Uganda
Source: Frontiers journal article supplement (doi:10.3389/fvets.2024.1427773), 2024-09-17
Supplement: Table_1.xlsx [file Table_1.xlsx]

## Sheet: Sheet1
	Serovar	Monophasic	Seroformular	MLN	Pig Fecal	Water	Floor swab	HSS	Carcass swab	Raw pork	HSR	Chopping surface	Cooked pork	Veg	Total	Proportion
				Point of pig slaughter						Point of retail
1	S.Zanzibar		3,10:k:1,5	4	5	0	6	4	5	5	2	9	0	0	40	11.5607
2	S. Subspecies II 42:r:-		42:r:-	2	1	2	8	3	5	8	3	7	0	0	39	11.2717
3	Subspec. I (Subspecies enterica I )	Monophasic	4,12:a:-	4	2	2	7	2	4	7	1	3	1	0	33	9.53757
4	S.Newport		6,8:e,h:1,2	6	2	2	7	0	2	4	1	2	0	0	26	7.51445
5	S.Uganda		3,10:l,z13:1,5	3	4	0	7	1	2	2	1	5	0	0	25	7.22543
6	S.Typhimurium		(1),4,5,12:i:1,2	0	2	3	5	1	3	2	1	0	3	0	20	5.78035
7	S.Stanleyville		(1),4,5,12:z4,z23:-	3	1	0	2	1	3	2	0	3	0	0	15	4.33526
8	S.Subspec. I Roughform		-:-:	0	0	0	1	1	4	2	3	1	0	0	12	3.46821
9	S.Hadar		6,8:z10:e,n,x	1	1	0	1	1	1	0	1	1	2	0	9	2.60116
10	S.Heidelberg		(1),4,5,12:r:1,2	0	2	0	7	0	0	0	0	0	0	0	9	2.60116
11	S.Kingabwa		43:y:1,5	1	1	0	1	1	1	1	1	2	0	0	9	2.60116
12	S.Offa		41:z38:-	1	0	0	2	1	2	0	1	1	0	0	8	2.31214
13	S.Kentucky		8,20:i:z6	0	0	0	1	1	2	1	1	0	0	1	7	2.02312
14	S.Agona		(1),4,12:f,g,s:	0	1	1	0	0	2	0	1	1	0	0	6	1.7341
15	S.Ramatgan		30:k:1,5	0	0	1	0	0	0	3	0	2	0	0	6	1.7341
16	S.Enteritidis		(1),9,12:g,m:-	0	1	0	1	2	1	0	0	0	0	0	5	1.44509
17	S.Guildford		28:k:1,2	0	0	0	1	1	0	1	1	1	0	0	5	1.44509
18	S.Adelaide		35:f,g:-	0	0	0	1	1	1	1	0	0	0	0	4	1.15607
19	S.Teshie		(1),47:l,z13,z28:e,n,z15	0	1	0	0	0	1	0	1	1	0	0	4	1.15607
20	Subspec. I	Monophasic	16:a:-	0	0	0	0	0	0	2	1	1	0	0	4	1.15607
21	Subspec. I	Monophasic	4,5,12:a:-	1	0	0	0	0	0	2	0	0	0	0	3	0.867052
22	S.Chicago		28:r:1,5	0	0	0	0	0	0	1	1	1	0	0	3	0.867052
23	S.Hvittingfoss		16:b:e,n,x	0	0	0	1	1	1	0	0	0	0	0	3	0.867052
24	S.Mikawasima		6,7:y:e,n,z15	0	1	1	1	0	0	0	0	0	0	0	3	0.867052
25	S.Nessziona		6,7:l,z13:1,5	0	0	0	0	0	1	0	2	0	0	0	3	0.867052
26	S.Os		9,12:a:1,6	0	1	0	0	0	0	0	0	2	0	0	3	0.867052
27	42:z39			0	0	0	0	1	1	0	0	0	0	0	2	0.578035
28	Rough PCR			1	0	0	0	0	1	0	0	0	0	0	2	0.578035
29	S.Aberdeen		11:i:1,2	0	0	0	0	1	0	0	1	0	0	0	2	0.578035
30	S.Blijdorp		1,6,14,25:c:1,5	0	0	0	1	0	1	0	0	0	0	0	2	0.578035
31	S.Cerro		18:z4,z23:-	0	0	0	0	0	1	0	1	0	0	0	2	0.578035
32	S.Hull		16:b:1,2	0	0	0	0	0	0	1	0	1	0	0	2	0.578035
33	S.Irchel		9,46:y:e,n,x	0	0	0	0	0	0	1	0	1	0	0	2	0.578035
34	S.Orion		3,10:y:1,5	0	1	0	0	0	0	1	0	0	0	0	2	0.578035
35	S.Urbana		30:b:e,n,x	0	0	0	0	0	0	1	0	1	0	0	2	0.578035
36	S. Subspec. II		47:z:z6	0	0	0	0	0	0	0	1	0	0	0	1	0.289017
37	S.Amsterdam		3,10:g,m,s:-	0	0	0	0	0	1	0	0	0	0	0	1	0.289017
38	S.Bolton		3,10:y:e,n,z15	0	0	0	0	0	0	0	0	1	0	0	1	0.289017
39	S.Bonn		6,7:l,v:e,n,x	0	1	0	0	0	0	0	0	0	0	0	1	0.289017
40	S.Bovismorbificans		6,8:r:1,5	0	0	0	0	0	0	0	0	1	0	0	1	0.289017
41	S.Braenderup		6,7:e,h:e,n,z15	0	0	0	1	0	0	0	0	0	0	0	1	0.289017
42	S.Eppendorf		(1),4,12:d:1,5	0	0	0	0	0	0	0	1	0	0	0	1	0.289017
43	S.Galiema		6,7:k:1,2	1	0	0	0	0	0	0	0	0	0	0	1	0.289017
44	S.Ilala		28:k:1,5	1	0	0	0	0	0	0	0	0	0	0	1	0.289017
45	S.Ituri		(1),4,12:z10:1,5	0	0	0	0	0	0	0	0	1	0	0	1	0.289017
46	S.Kingston		(1),4,12,27:g,s,t:-	0	0	0	0	0	0	0	0	1	0	0	1	0.289017
47	S.Luke		(1),47:g,m:-	0	0	0	0	0	0	0	0	1	0	0	1	0.289017
48	S.Montevideo		6,7:g,m,s:	0	0	0	0	0	0	0	1	0	0	0	1	0.289017
49	S.Senftenberg		1,3,19:g,s,t:-	0	0	0	1	0	0	0	0	0	0	0	1	0.289017
50	S.Subspec. II Rauform		-:-:	0	0	0	0	1	0	0	0	0	0	0	1	0.289017
51	S.Tilene		(1),40:e,h:1,2	0	1	0	0	0	0	0	0	0	0	0	1	0.289017
52	S.Umbilo		28:z10:e,n,x	0	0	0	0	0		1	0	0	0	0	1	0.289017
53	S.Zega		9,12:d:z6	0	0	0	1	0	0	0	0	0	0	0	1	0.289017
54	Subspec. I		4,5,12:a:-	0	1	0	0	0	0	0	0	0	0	0	1	0.289017
55	Subspec. I		42:-:-	0	0	0	0	0	0	0	1	0	0	0	1	0.289017
56	Subspec. I		42:z39:-	0	0	0	0	0	0	1	0	0	0	0	1	0.289017
57	Subspec. I	Monophasic	4,5,12:r:-	0	1	0	0	0	0	0	0	0	0	0	1	0.289017
58	Subspec. I	Monophasic	47:l,13,z28:-	0	0	0	0	1	0	0	0	0	0	0	1	0.289017
59	Subspec. I		16:y:1,7	0	0	1	0	0	0	0	0	0	0	0	1	0.289017
	Sub-totals			29	31	13	64	26	46	50	29	51	6	1	346	100
